# Supplementary material for: A high-spatial resolution soil carbon and nitrogen dataset for the northern permafrost region, based on circumpolar land cover upscaling
Source: Copernicus journal article supplement (doi:10.5194/essd-2022-8), 2022-02-02
Supplement: Supplementary file 1 [file essd-2022-8-supplement.pdf]

Permafrost soils and vegetation sampling protocol - Stockholm University ver. 03/06/2018

|                  |  |                    |  |                             |
|------------------|--|--------------------|--|-----------------------------|
| <b>Site name</b> |  | <b>Coordinates</b> |  | <b>Photographs / Camera</b> |
|                  |  |                    |  | site<br>pit                 |
| Date             |  | observer(s)        |  |                             |

**General site description (sketch on following side)**

| Depth                       | Depth Top                                                                             | PF Table          | Transient Layer        | Water table                                       | Drainage                       | Mudboils                                | Tussocks          | Elevation                     | Slope (°)                        | Aspect                                              |                                   |
|-----------------------------|---------------------------------------------------------------------------------------|-------------------|------------------------|---------------------------------------------------|--------------------------------|-----------------------------------------|-------------------|-------------------------------|----------------------------------|-----------------------------------------------------|-----------------------------------|
| Frozen AL                   | Permafrost                                                                            | Form (even, wavy) | Layer -from-to         | calculate as negative. Soil surface is +0!        | (dry, moist, wet, waterlogged) | (non, few, a lot, active yes/little/no) | (non, few, a lot) |                               |                                  |                                                     |                                   |
| <b>SOIL CLASSIFICATION:</b> |                                                                                       |                   |                        |                                                   |                                |                                         |                   |                               |                                  | Max depth:                                          |                                   |
| Depth up - low              | <b>HORIZON</b><br>Master, Suffix, Modifier<br>If per Horizon, then sample all horizon |                   | Texture sand/silt/clay | Notes – Horizon boundaries<br>smooth/wavy/broken? |                                |                                         | Munsell color     | Colour and REDOX features Y/N | Roots Size: fine, medium, coarse | through, horizon bound, in cracks; few, common many | Not sampled COARSE FRAGMENTS in % |
| 0-11                        | Oi1                                                                                   |                   | peat                   | Example                                           |                                | Oi on Hummock                           | SYR 4/4 n         |                               | f/t/m                            | 20 %'                                               |                                   |

| Sample description | Depth | Dimensions | Horizon | Texture | Notes (color/material) | CryoT/SynG / Buried (1/2/3) | Redox features?? | roots #in/□ (th/R) #,cm) | vis. ice % | ice struc. (lens, vein, net, suspende d, ice wedge) |
|--------------------|-------|------------|---------|---------|------------------------|-----------------------------|------------------|--------------------------|------------|-----------------------------------------------------|
| OL1/PP/RC/C14      | 0-5   | 0x0x0cm    |         |         |                        |                             |                  |                          |            |                                                     |

Example:

|     |       |       |    |                 |                            |     |                   |       |      |         |
|-----|-------|-------|----|-----------------|----------------------------|-----|-------------------|-------|------|---------|
| OL1 | 0-5   | 5x5x6 | Oi | organics        | very fibric peat           | -   | OM/no             | f/t/m | 0-   |         |
| pp  | 80-90 |       | CF | Silty fine sand | Darkbrown with red mottles | CT2 | Silt./red mottles | no    | 5 %' | poreice |

**reason for max depth eq. pipe length, stone(s), bedrock:**

Contributors: Matthias Siewert - Niels Weiss - Juri Palmtag - Gustaf Hugelius - Peter Kuhry

Permafrost soils and vegetation sampling protocol - Stockholm University ver. 03/06/2018

|                                                                                                                                                                                   |                                                                |                                                                     |                                                                                                                      |
|-----------------------------------------------------------------------------------------------------------------------------------------------------------------------------------|----------------------------------------------------------------|---------------------------------------------------------------------|----------------------------------------------------------------------------------------------------------------------|
| Site name/ Plot nr.                                                                                                                                                               | Coordinates                                                    | Photographs                                                         |                                                                                                                      |
| Date                                                                                                                                                                              | Observer(s)                                                    |                                                                     |                                                                                                                      |
| Sketch and additional notes:<br><small>i.e. topography, microtopography, valley, depression, top of palsa, alas, frost boils, polygon position (center/rim/trough), etc..</small> |                                                                |                                                                     |                                                                                                                      |
| <b>Landform (x or text) (sketch on next side):</b>                                                                                                                                |                                                                | <b>Parent Material of pit chose from the following or describe:</b> |                                                                                                                      |
| Flat terrain                                                                                                                                                                      | Moraine                                                        | Sphagnum peat Moss Parent Material P1:                              |                                                                                                                      |
| Yedoma                                                                                                                                                                            | Talus                                                          | Sedge peat                                                          |                                                                                                                      |
| Fluvial (bed, terrace)                                                                                                                                                            | Fen (groundw.)                                                 | Mineral Yedoma Parent Material P2:                                  |                                                                                                                      |
| Palsa                                                                                                                                                                             | Bog (rainw.)                                                   | Fluvial (clay, sand, gravel) Moraine                                |                                                                                                                      |
| Hillslope (ridge/mid/ree)                                                                                                                                                         | Ice-wedge polygon (low/high) (center /rim/trough; sketch!!!)   | Colluvial Bedrock (Type?) Parent Material P3:                       |                                                                                                                      |
| Alluvial fan                                                                                                                                                                      |                                                                | Notes:                                                              |                                                                                                                      |
| Aeolean deposit                                                                                                                                                                   | Other:                                                         |                                                                     |                                                                                                                      |
| Lacustrine                                                                                                                                                                        |                                                                |                                                                     |                                                                                                                      |
| Sketch and additional notes:<br><small>i.e. topography, microtopography, valley, depression, top of palsa, alas, frost boils, polygon position (center/rim/trough), etc..</small> |                                                                |                                                                     |                                                                                                                      |
|                                                                                                                                                                                   |                                                                |                                                                     |                                                                                                                      |
| Make sketch for position in ice-wedge polygon!!!                                                                                                                                  |                                                                |                                                                     |                                                                                                                      |
| <b>Vegetation sampling</b>                                                                                                                                                        | percentage coverage from above with mass in mind on 1x1m basis |                                                                     | <b>Additional Notes</b><br>If trees or shrubs higher than 2m present, make additional notes on 5x5m or 10x10m basis. |
| Quadrat size (cm x cm)                                                                                                                                                            | Heights (cm)                                                   |                                                                     |                                                                                                                      |
| Plant functional Type                                                                                                                                                             | Rep1                                                           | Rep2                                                                | Rep3                                                                                                                 |
| Evergreen shrubs (eg. Cassiope, Ledum, Vaccinium, dryas. (Most berries))                                                                                                          |                                                                |                                                                     |                                                                                                                      |
| Deciduous shrubs (eg. Betula, Salix, Alnus )                                                                                                                                      |                                                                |                                                                     |                                                                                                                      |
| Sedges (Eriophorum, Carex) (triangular stem!)                                                                                                                                     |                                                                |                                                                     |                                                                                                                      |
| Grasses and rushes (round stem)                                                                                                                                                   |                                                                |                                                                     |                                                                                                                      |
| Forbs (broad-leaved herbaceous non grass)                                                                                                                                         |                                                                |                                                                     |                                                                                                                      |
| Sphagnum Moss                                                                                                                                                                     |                                                                |                                                                     |                                                                                                                      |
| MOSSES (if present, record green and brown tissue heights/depths separately)                                                                                                      |                                                                |                                                                     |                                                                                                                      |
| Lichens                                                                                                                                                                           |                                                                |                                                                     |                                                                                                                      |
| Litter on/in vegetation                                                                                                                                                           |                                                                |                                                                     |                                                                                                                      |
| Rock and stones                                                                                                                                                                   |                                                                |                                                                     |                                                                                                                      |
| Bare soil                                                                                                                                                                         |                                                                |                                                                     |                                                                                                                      |
| Water                                                                                                                                                                             |                                                                |                                                                     |                                                                                                                      |

Contributors: Matthias Siewert - Niels Weiss - Juri Palmtag - Gustaf Hugelius - Peter Kuhry

Figure S1. Field sampling protocol
